# Supplementary material
Source: publisher figshare collection journal article supplement (https://acs.figshare.com/ndownloader/files/22775666)
Supplement: Supplementary file 1 [file 22775666]

## Sheet: Cover page
SUPPORTING INFORMATION
Workflow for Rapidly Extracting Biological Insights from Complex, Multicondition Proteomics Experiments with WGCNA and PloGO2
Jemma X. Wu1*, Dana Pascovici1, Yunqi Wu1, Adam Walker3,4, Mehdi Mirzaei 1,2,5
1 Australian Proteome Analysis Facility, Macquarie University, Sydney, NSW, Australia
2 Department of Molecular Sciences, Macquarie University, Sydney, NSW, Australia
3 Neurodegeneration Pathobiology Laboratory, Queensland Brain Institute, The University of Queensland, QLD, Australia
4 Centre for Motor Neuron Disease Research, Department of Biomedical Sciences, Faculty of Medicine and Health Sciences, Macquarie University, NSW, Australia
5 Department of Clinical Sciences, Macquarie University, Sydney, NSW, Australia
* Correspondence: jemma.wu@mq.edu.au.
Table of contents
Supporting information file 3 S1. KEGG pathway annotations for the main dataset.
Supporting information file 3 S2. The abundance data file for the main dataset.

## Sheet: S1 pathwayDB
Protein	x
A0A0N7KEB1	osa01100 osa01212 osa01040 osa00061
A3C4S4	osa01100 osa01110 osa00520 osa00053
B7E914	osa01100 osa00190
B7EKA4	osa01100 osa01110 osa01230 osa00270
B7ERZ5	osa01100 osa01110 osa00010
B9FK56	osa04141 osa04144 osa03040
B9FPW2	osa01100 osa01110 osa00500 osa00940 osa00460
B9FQQ6	osa03050
B9FSC3	osa01100 osa00500 osa00520 osa00051
B9G4B3	osa03018
C7IY39	osa01100 osa01110 osa00904
E5D3K1	osa04141
E9KIM9	osa01100 osa00195
E9KIN9	osa03010
I3QD45	osa01100 osa01110 osa01200 osa00010 osa01230 osa00710
K4FDV3	osa01100 osa00500
P12123	osa01100 osa00195
P12124	osa01100 osa00190
P14654	osa01100 osa00630 osa01230 osa00250 osa00220 osa00910
P14717	osa01100 osa01110 osa00940 osa00360
P16081	osa01100 osa00910
P25765	osa01100 osa00520 osa04016
P41344	osa01100 osa00195
P42862	osa01100 osa01110 osa01200 osa00010 osa00500 osa00520 osa00030
P48642	osa01100 osa00480
Q07661	osa01100 osa01110 osa00230 osa04016 osa00240
Q0D9C4	osa01100 osa01110 osa01200 osa00630 osa04146 osa04016 osa00380
Q0D9D0	osa01100 osa01110 osa00500
Q0DC43	osa01100 osa01200 osa00630
Q0DCI1	osa01100 osa01110 osa00010 osa00051 osa00030
Q0DFC9	osa00195
Q0DGD7	osa01100 osa00052 osa00600 osa00511 osa00531 osa00604
Q0DV32	osa01100 osa01110 osa00940 osa00130 osa00999
Q0IN14	osa04141 osa04626
Q0J4K2	osa01100 osa01110 osa00592 osa00591
Q0J7M1	osa01100 osa01110 osa00561 osa04070 osa00564
Q0J8G4	osa01100 osa00500 osa00520 osa00051
Q0JB49	osa01100 osa00480 osa00590
Q10A46	osa01100 osa01110 osa00010 osa00071 osa00350
Q10G56	osa01100 osa01110 osa00330
Q10L56	osa01100 osa00480 osa00590
Q10LH0	osa01100 osa01110 osa00860
Q10LW8	osa01100 osa00620
Q10MK9	osa01100 osa01110 osa01200 osa00010 osa00630 osa00620 osa00650
Q10N17	osa01100 osa01110 osa01230 osa00400
Q10N88	osa04144
Q10NA1	osa04141 osa04144 osa03040
Q10NP6	osa03040
Q10NX2	osa01100 osa01110 osa01200 osa00010 osa00620 osa00710 osa00020
Q10PD0	osa01100 osa00740
Q10S49	osa01100 osa00480
Q10SR3	osa03018
Q2QNG7	osa01100 osa01110 osa00020
Q2QNN5	osa01100 osa01110 osa00592 osa00591
Q2QPR0	osa01100 osa01110 osa00940 osa00360
Q2R3A1	osa01100 osa01110 osa00941 osa04712
Q337Y2	osa01100 osa01110 osa00902
Q338N8	osa01100 osa01200 osa01230 osa00710 osa00250 osa00220 osa01210
Q53JI9	osa01100 osa00500
Q53NG8	osa01100 osa01110 osa00010 osa00620 osa00280 osa00071 osa00053 osa00330 osa00380 osa00410 osa00561 osa00340 osa00310 osa00903
Q53RM0	osa01100 osa01110 osa00860
Q5JKZ9	osa01100 osa00052 osa00600 osa00511
Q5QMT0	osa01100 osa01110 osa00500 osa00940 osa00460
Q5SNH5	osa01100 osa01110 osa01200 osa00010 osa01230 osa00051 osa00030 osa00052 osa03018
Q5W6F1	osa01100 osa01110 osa00940 osa00130 osa00941 osa00999 osa00945
Q5W6W7	osa01100 osa04146 osa00071 osa01212 osa00061
Q5WMX0	osa01100 osa00520
Q5Z5T3	osa01100 osa00053
Q5ZCK5	osa04626
Q60EA3	osa01100 osa00920
Q60EJ3	osa01100 osa01110 osa00130
Q652V8	osa04141
Q655Q2	osa01100 osa01110 osa00280 osa00640
Q655T1	osa01100 osa01110 osa01200 osa00010 osa01230 osa00710
Q67WR5	osa01100 osa00520 osa00051
Q69P84	osa01100 osa01110 osa00010 osa00620 osa00280 osa00071 osa00053 osa00330 osa00260 osa00380 osa00410 osa00561 osa00340 osa00310
Q69UU3	osa01100 osa01110 osa01200 osa00630 osa01230 osa00710 osa00250 osa00260 osa00220 osa01210
Q6ATB2	osa01100 osa00230
Q6AUV1	osa01100 osa01110 osa04146 osa00230 osa00232
Q6AVG6	osa01100 osa01110 osa00900
Q6ESJ0	osa01100 osa00480 osa00590
Q6ETN3	osa01100 osa01110 osa00940 osa00130 osa00999
Q6EUD7	osa01100 osa01200 osa00620 osa00710
Q6H4V1	osa01100 osa00130 osa00360 osa00350
Q6H7M1	osa01100 osa00350
Q6H7Q6	osa01100 osa01110 osa00592 osa00591
Q6K2P3	osa01100 osa01110 osa00010
Q6K853	osa03010
Q6K8J4	osa01100 osa01110 osa00900
Q6L509	osa04141 osa04144 osa03040
Q6V9T1	osa01100 osa01110 osa01200 osa00630 osa00260
Q6YT73	osa01100 osa01110 osa01200 osa00630 osa04146
Q6YXT5	osa01100 osa00053
Q6YZ75	osa01100 osa00280
Q6YZE2	osa01100 osa01110 osa00860
Q6Z1Y6	osa01100 osa00380
Q6Z4A7	osa01100 osa00920
Q6Z744	osa01100 osa00410 osa00240 osa00770
Q6ZC69	osa01100 osa01110 osa00230 osa00730
Q6ZFI6	osa01100 osa01110 osa01200 osa00630 osa04146 osa00250 osa00260
Q6ZFJ3	osa01100 osa00195
Q6ZFJ9	osa03018
Q6ZG77	osa01100 osa01110 osa01230 osa00300
Q6ZHZ1	osa01100 osa00500
Q75GI3	osa04145
Q75II5	osa00790
Q75IJ1	osa04144 osa04145
Q75KD7	osa01100 osa01110 osa00592
Q7FAL6	osa01100 osa01110 osa00900
Q7FAX1	osa00073
Q7X7H3	osa01100 osa01110 osa01200 osa00630
Q7XAP2	osa01100 osa00480 osa00330 osa00270
Q7XCK0	osa01100 osa00480
Q7XIE2	osa04130
Q7XJ02	osa01100 osa00480 osa00053
Q7XMP7	osa01100 osa01110 osa00250 osa00460
Q7XPY2	osa01100 osa00190
Q7XSU8	osa01100 osa01110 osa00940
Q7XTJ3	osa01100 osa01110 osa01200 osa00010 osa00620 osa00020
Q7XV18	osa01100 osa01110 osa00250 osa00410 osa00650 osa00430
Q7XV86	osa04141 osa04145
Q84MQ4	osa03010
Q84P96	osa01100 osa01110 osa00592 osa04146 osa00280 osa00071 osa01212 osa01040
Q84T92	osa01100 osa01110 osa00941
Q84TX6	osa01100 osa00010 osa00562
Q84YK7	osa01100 osa01110 osa00500 osa00940 osa00460
Q84ZL6	osa01100 osa01110 osa01200 osa01230 osa00030
Q850T5	osa00195
Q8H4E0	osa01100 osa01110 osa01200 osa00630 osa00620 osa00710 osa00020 osa00270
Q8H4V1	osa01100 osa01200 osa00620 osa00710
Q8H7S6	osa01100 osa00500
Q8H879	osa01100 osa00190
Q8H8C7	osa04626
Q8H8D6	osa01100 osa00480
Q8H8D8	osa01100 osa00480
Q8RZW7	osa01100 osa00920
Q8S9U5	osa01100 osa00480
Q8W084	osa04626 osa04016 osa04075
Q8W250	osa01100 osa01110 osa00900
Q8W3D9	osa01100 osa01110 osa00860
Q8W3J0	osa01100 osa00520
Q942L2	osa04141
Q945W2	osa01100 osa00480
Q945W3	osa01100 osa00480
Q945W5	osa01100 osa00480
Q948T6	osa01100 osa00620
Q94LR9	osa01100 osa01110 osa00592 osa04146 osa00280 osa00071 osa01212 osa01040
Q9AS33	osa04141
Q9AUQ4	osa01100 osa01110 osa00010 osa00500 osa00520 osa00030 osa00230 osa00052
Q9AXB0	osa01100 osa01110 osa00860
Q9FW31	osa01110 osa00592
Q9LDN2	osa01100 osa00240
Q9SDJ2	osa01100 osa01110 osa00860
Q9SXV0	osa01100 osa00190

## Sheet: S2 Abundance data
Uniprot	Means.2Moderate	Means.3Extreme	Means.4Recovery	Means.5ControlA
Q0DI31	-0.0340105	0.161426	0.0516168	-0.0295298
Q94JF2	0.0781833	1.06715	0.448233	-0.0503903
Q7XSU8	0.0150862	0.161083	0.0680913	0.0131866
Q9LWY6	0.0329483	0.130323	0.0434022	0.0245368
Q6EUD7	0.0290064	0.093738	0.0501826	0.0149129
Q9FRU0	-0.0743695	0.160816	-0.0776362	-0.173875
B7E9D7	-0.121896	0.461357	0.2721	-0.100032
Q336R9	5.67e-05	0.0382	0.00613689	-0.0609304
Q10QV0	0.0690461	0.112713	0.0515938	0.0774077
Q4LB25	0.0491773	0.228862	0.129386	0.0024421
Q8H916	0.017082	0.257624	0.0769687	0.0121041
Q6YZ75	0.0201628	0.0884076	0.0385077	0.00842033
Q7XTB4	0.0215602	0.101018	0.02073	-0.0196648
Q0J8R9	0.104348	0.353137	0.161104	0.0517704
Q6Z8P2	-0.000848977	0.112957	-0.00836819	-0.0157534
Q6YSB2	-0.0128659	0.0948789	-0.0324737	-0.0119681
Q6ZIF9	0.00350303	0.0970782	0.0224603	0.00985543
Q6H4V1	0.0152316	0.289973	0.00588604	-0.0117535
Q0DCI1	0.0496334	0.134124	0.0235162	-0.02056
Q0J0C4	-0.0624904	0.0234472	-0.0284116	-0.0745199
Q5Z5T3	-0.115666	0.0247581	-0.119668	-0.0895342
Q0JNR2	-0.00262314	0.13312	-0.013291	-0.00999909
Q5D214	-0.0273075	0.0749779	0.0066024	-0.0276515
Q5VQG4	0.0178421	0.171381	0.0265192	0.0227513
Q84NJ4	-0.0614666	0.0183448	-0.0770164	-0.0227411
Q6YZX6	0.0174084	0.100885	0.0326725	0.0112248
Q6K669	0.0128854	0.10054	0.0254742	-0.00569083
Q2QZU4	-0.0318186	0.128748	0.0127461	-0.0268853
Q0INM9	0.0423236	0.413551	0.0257576	-0.0207123
Q2QPR0	-0.137348	-0.0679668	-0.13241	-0.0685801
A3AYP1	-0.0773024	0.178564	-0.0402405	-0.0675224
Q10NA1	0.0865678	0.749957	0.311205	0.0563634
Q6AUV1	0.059758	0.238884	0.052405	0.0208165
Q10FJ2	-0.0685454	0.0308342	-0.0975157	-0.0123453
Q2QME8	-0.0053134	0.101479	0.00467569	0.0488718
Q5SNH5	0.0345836	0.080991	-0.0440501	0.00128474
Q9LE07	0.00603935	0.182687	-0.0340281	-0.0144965
Q655Q2	0.0180788	0.0961624	0.00841348	0.0203017
Q942L2	-0.00631821	0.0876873	0.0395342	0.0100915
Q9AS33	0.0403562	0.118137	0.0348468	0.00801592
Q5QMT0	0.045757	0.261233	0.109043	-0.0357723
Q94E74	0.0264918	0.354268	0.137727	0.0147116
Q5QM39	-0.0690706	-0.0180885	-0.082514	-0.0305519
Q8S9U5	0.040926	0.281312	0.0850397	-2.91e-05
P40392	-0.0124354	0.0855667	-0.00684417	0.02954
Q0JKR6	0.0362922	0.741501	0.301176	0.00794173
Q5N8I8	0.0379737	0.109771	-0.00762844	0.0228171
A0A0P0VAH1	0.117393	0.553974	0.0882209	-0.0433453
Q5N7Y1	0.0214243	0.448565	0.0578444	0.0198817
Q9LDN2	-0.0195579	0.148235	0.0283995	0.0129306
Q5JKZ9	0.0131331	0.118211	0.0684672	0.00112336
Q6ZFJ9	0.0503328	0.16128	0.0954311	0.0347067
Q6ZH98	-0.00974002	0.108815	0.00369677	-0.0184244
Q6H7M1	-0.0279463	0.196703	0.0460908	-0.0212413
Q6Z6L4	-0.00894274	0.0846098	0.014845	0.00760504
Q6K7A3	-0.156695	0.0710338	0.0507458	-0.146373
Q6H795	0.0135067	0.226636	0.0303032	-0.00888279
Q6K623	-0.0573923	0.17651	-0.0626817	-0.0550852
Q6ESJ0	-0.0266577	0.0846497	0.00304919	-0.00801974
Q8S3R7	-0.0073417	0.236362	0.0403392	0.00309305
Q6Z744	0.00767211	0.178481	0.083189	0.0212559
Q6Z6A7	-0.0171343	0.220928	0.103625	-0.0290518
E5D3K1	-0.305342	0.136959	-0.439294	0.00437718
Q6K689	-0.0183843	0.0947195	0.0229551	-0.0230501
P48642	-0.00137462	0.136701	0.0328906	-0.00116241
Q84P96	-0.0291297	0.130592	-0.032046	-0.0366832
Q6KAA6	0.143894	0.534291	0.310061	0.0604408
Q0DW19	-0.000266583	0.114221	0.0166146	-0.0103947
Q10SR3	-0.0354955	0.148019	-0.00243226	0.0117011
Q10S64	-0.0178707	0.523824	0.0822936	0.00573195
Q8H8C7	-0.0779545	0.0516192	0.0191969	-0.0848413
Q10PD0	0.0350811	0.242681	0.058322	-0.0070717
Q10NP6	-0.037275	0.00419153	-0.0873389	-0.0299042
Q10NC7	-0.0274776	0.0263496	-0.0533693	-0.0348446
Q10N17	-0.0125029	0.0378249	-0.0294002	-0.0433152
Q10MK9	-0.0684139	0.218488	-0.0243218	-0.00349606
Q10MK4	0.0966524	0.745114	0.486886	0.0329528
Q10M57	-0.0339763	0.0630429	-0.0329741	-0.0112472
Q10M12	-0.0819256	0.10896	-0.0174992	-0.0876224
Q10LW8	0.00388929	0.0831738	0.0184735	-0.0125608
K4FDV3	0.0543122	0.359352	0.184181	0.0208557
Q10L56	0.0215653	0.130003	0.0914741	0.0162642
Q60DC5	-0.0356177	0.0592362	-0.00480311	0.0278747
Q851K0	0.0565313	0.37418	0.247399	-0.0173039
Q53RK6	-0.00435658	0.0956986	0.0728153	0.0286997
Q9AUQ4	-0.0113981	0.0391787	-0.00446505	-0.0431161
Q851F9	0.0708334	0.489092	0.102418	0.0587731
P42862	-0.0473413	0.0355118	0.0186783	-0.0418509
Q84TX6	0.0324632	0.368433	0.0987099	-0.00669125
Q84TB3	0.0472571	0.0970571	0.0308807	-0.00670698
Q7Y152	-0.0208765	0.111802	-0.0177838	-0.00979272
Q7XTJ3	-0.0317898	0.167773	0.0108072	-0.022084
O04138	0.0218324	0.425519	0.458491	0.0918251
P55142	0.0257144	0.170515	0.0422008	0.0323989
Q7FAX1	0.0213545	0.741176	0.32734	-0.011929
Q0JB49	-0.0307966	0.0963559	-0.0730972	-0.0148432
Q7X8B5	-0.0509527	0.134076	-0.0682507	-0.00100746
Q7XPL4	0.15022	1.13027	0.706973	0.0690966
Q0J9V5	0.106809	0.248109	0.106673	0.0750682
Q7XPN4	0.0646494	0.216155	0.121909	-0.0234847
Q84P62	0.0123063	0.0965369	0.0500718	0.0121375
Q7XPI5	-0.0051424	0.0557537	0.0314109	-0.0247939
Q65XA0	-0.00599432	0.0765466	-0.0246086	0.00314583
Q75M01	0.0385139	0.151308	0.062912	0.0405611
Q0DK70	-0.0708333	0.325569	0.0306576	-0.0206914
Q5W6W7	0.0140701	0.123693	-0.00225526	0.0419248
Q75K72	-0.0281318	0.129563	0.0620452	0.00829272
A0A0P0WMW0	0.0416301	0.416829	0.0891385	0.0304172
Q75HX0	-0.0387479	0.169713	0.0235148	0.00673562
Q6L509	0.0118456	0.233095	-0.0023307	-0.00945295
Q84KJ7	-0.0906927	0.10318	-0.0613377	0.000858929
P20907	-0.0311295	0.290721	0.058387	0.0271457
Q60EJ0	0.0181109	0.109266	0.0103454	-0.0108619
Q6L4X5	0.0251826	0.106525	0.0547193	0.0260044
Q75IJ1	0.00937811	0.121801	0.0117134	0.0112672
V5K4U5	0.100542	1.11173	0.569004	0.0578546
Q6I605	-0.0382656	0.249597	0.05281	-0.0534619
Q65XL5	-0.0611445	0.0333439	-0.0303986	-0.12223
Q6K853	-0.0511164	0.0192016	-0.052137	-0.0837223
Q5SMV5	-0.08395	-0.0263324	-0.102884	-0.0427362
Q69Y12	0.0295957	0.143619	0.0975437	0.0730061
Q69TI3	-0.141594	-0.0175473	-0.167252	-0.0798822
Q652V8	-0.036129	0.167963	-0.104278	0.00856162
A0A0P0WUR5	-0.0546245	0.0294984	0.00162824	-0.0574359
Q652S1	-0.000669701	0.0726077	0.0087536	-0.0159839
Q0DC43	-0.0134915	0.0762655	0.027413	0.00336124
Q656A5	0.0409973	0.338101	-0.0114401	-0.0246882
Q7XAP2	0.00757961	0.141607	-0.020905	0.00406038
Q69U02	0.00198589	0.0925955	-0.012369	0.00914796
Q67WU6	-0.169088	0.112878	-0.0274527	-0.0283273
Q67UQ1	0.144558	0.593769	0.0599678	0.0829784
Q655T1	0.0590575	0.459971	0.217056	0.0136365
Q5Z802	-0.019105	0.0430202	-0.0477909	-0.00770175
Q8H559	-0.0054389	0.105817	0.0196578	-0.000999114
Q0D840	-0.0295268	0.359971	0.0203374	-0.018561
Q0D6H5	-0.0120261	0.179882	0.0461675	-0.0641885
Q07661	0.0176823	0.0734158	0.0444371	-0.00984562
Q7XI43	-0.0235601	0.0582069	0.00936388	-0.0281901
Q6YXT5	-0.118903	-0.0113935	-0.151321	-0.0271405
Q6YPF2	-0.00457865	0.121185	0.0118017	-0.00445965
Q84UR8	-0.00380415	0.106465	0.028803	-0.00377651
Q84ZL6	-0.0188982	0.0613827	0.017265	-0.000756715
Q948T6	-0.0103062	0.12928	-0.00768196	-0.0205807
Q6ZHZ1	0.0110851	0.0691057	0.0279345	-0.0110406
Q8H4V1	-0.0256416	0.0611961	-0.0202276	-0.0370805
Q6YW59	0.0377008	0.353668	-0.011527	-0.0549586
Q84Q47	0.0222968	0.462189	0.18871	-0.0468867
Q6K456	-0.026985	0.0628747	-0.0270665	-0.0631198
Q7XJ15	-0.0382779	0.0853992	0.00515239	-0.0448846
Q0IZX5	0.000837851	0.0941892	-0.012707	0.0443667
Q7G649	0.0179589	0.0781241	-0.0267707	-0.0306266
Q0IXZ5	0.0557295	0.472872	0.201079	0.03719
Q338N8	-0.0228938	0.180105	0.034802	-0.0134705
Q9FWU4	0.0113157	0.122958	0.058841	-0.0253976
Q53NE7	-0.111529	0.0171484	-0.0677438	-0.0864914
Q53NG8	-0.0215521	0.0912388	0.0271619	0.00249932
Q53PA7	0.0248637	0.079463	0.0180736	-0.0260882
V5K4S5	-0.114476	0.151249	-0.0745669	-0.0470464
Q2QXL3	0.0382594	0.243045	0.107844	0.00603902
Q0IN14	0.0426305	0.119482	0.0507475	0.0191195
Q7XJ02	-0.0103365	0.0605836	-0.0130106	-0.0292793
Q0IWL9	0.0127636	0.140886	0.0244557	-0.00132316
Q8S7M7	0.0194033	0.169867	0.0721558	0.0369817
Q2R1V2	0.00791665	0.957074	0.482436	-0.0824267
A3A9I1	0.0247465	0.136098	0.0168001	0.0135315
P25765	0.0746528	0.406693	0.17295	0.0507181
Q7X9A7	-0.00617811	0.0783164	0.00281185	-0.00190049
Q69P84	0.0155449	0.311745	0.091967	-0.00821313
A3CHA2	0.0989221	0.842707	0.418783	0.0280896
A3A9Z4	0.0853776	0.47974	0.119242	0.0178447
A3AH26	0.188244	0.41706	0.184789	0.100223
A3BMI4	-0.010609	0.077732	-0.00120483	0.0609908
E0X6V8	-0.261553	0.0463038	-0.183787	-0.129795
Q0D9C4	-0.0290208	0.0835086	-0.025177	-0.0317882
Q0DV32	-0.00385429	0.0862673	-0.0147757	-0.00743058
B9G718	0.045998	0.128912	0.0588597	0.018995
Q53JI9	-0.00631869	0.0984052	0.042767	-0.0223237
Q0JQG3	-0.0136097	0.0792459	-0.0446987	0.0358335
B9EXV3	-0.0325038	0.0459751	-0.106343	0.0381048
Q10G56	0.0169356	0.33811	0.152403	-0.0302218
C7IZL4	-0.0508394	0.0709532	0.0212605	-0.0773029
Q7XJY1	-0.0506224	0.286701	-0.0421595	-0.149406
Q6L4M6	0.159884	0.137557	0.0404142	-0.0270283
B9FPW2	-0.0264596	0.0213727	-0.0672684	-0.0148127
Q0DFR7	0.0200559	0.100632	0.0570446	-0.0628422
B9FRS2	0.05803	0.0930428	0.0967529	0.0662292
Q656J2	0.0533772	0.186908	0.0578935	0.0651928
Q6YVU4	0.021742	0.15353	0.0674663	0.0670281
B9FUS5	-0.0216585	0.124963	0.0251071	0.000189076
Q0J4K2	-0.173801	-0.0296641	-0.0318828	-0.0529427
Q6ZBH2	0.0433183	0.159057	0.0930291	0.0126749
B9G4B3	0.0413835	0.12754	0.0108506	-0.0023265
B9G947	0.0200234	0.0940573	0.0349838	0.0379801
B9EXZ2	0.0505277	0.181311	0.0261222	0.0117873
B9EW27	0.0245531	0.0954609	0.023954	-0.000591194
B9F3L6	0.0770977	0.364372	0.0847054	0.0461623
B9F4N0	-0.00269244	0.0485794	0.00531187	-0.0405502
B9FBJ1	0.0918262	0.972045	0.374475	0.060722
B9F6M6	0.0394995	0.107947	0.0523045	0.0162154
B9F5T2	0.00277284	0.122374	0.0445168	0.0163807
B9FF68	0.0532067	0.404434	0.113059	-0.0612181
B9FCV6	0.00488789	0.118071	0.0508297	0.0059975
B9FK56	-0.0133407	0.0431156	0.0194653	-0.0453083
B9FNW3	-0.0139256	0.0804154	0.0373073	-0.0306693
B9FKI4	-0.00786934	0.0780848	0.00558904	0.0178982
B9FQQ6	-0.0139043	0.0642791	-0.0243623	-0.00223464
B9FU76	0.0260986	0.181791	0.0535108	-0.0444142
B9G0S3	0.0178372	0.100398	0.0354198	0.0146062
B9G320	0.108818	0.623815	0.39088	0.0704793
B9G3F6	0.0492747	0.0936981	0.0416298	0.0541135
B9G4B4	0.0501838	0.0843525	0.0344116	0.00388728
B9G4C7	-0.0248513	0.198054	0.026133	0.0438894
I3QD45	0.00652975	0.142928	0.0388643	-9.49e-05
Q5ZCK5	-0.0942797	0.098128	-0.127195	-0.0305902
Q5ZDH9	-0.0363295	0.0488806	-0.025854	-0.0113678
Q852G4	-0.00180708	0.122787	0.018208	-0.0177519
Q5WMX0	-0.0631548	0.0943611	0.0469983	-0.0950084
B7E4S0	-0.00476895	0.169776	0.0204797	0.0210007
Q7Y0E0	-0.0653299	0.268432	-0.0159712	-0.0804785
C7J745	0.00413888	0.155269	0.0623174	0.00165768
Q2R376	0.0278917	0.590923	0.194324	-0.00998399
Q10QA5	0.0129399	0.244407	0.00226233	-0.0268812
B7ERZ5	-0.000467407	-0.0632264	0.0322076	-0.00329918
Q75GI3	0.0198144	-0.210492	-0.0239018	0.00387528
Q9SNK8	-0.0192992	-0.191579	-0.0564912	-0.0282096
Q7XMP7	0.0204028	-0.271323	-0.0323553	0.0702935
E9KIN9	-0.0251724	-0.089509	-0.0322548	-0.0448843
E9KIP3	-0.00931021	-0.0845368	-0.00940462	-0.0361805
E9KIQ6	-0.0842699	-0.202339	-0.125897	-0.0930457
E9KIS6	0.0178629	-0.0513732	0.033836	-0.0144155
Q94GE8	0.0768153	-0.00124021	-0.0173061	0.0319186
Q8W315	0.051617	-0.0433742	-0.00402609	0.0559153
Q8LI58	0.0862059	-0.136839	0.0134045	0.0318843
P14654	-0.0509116	-0.1309	0.00329115	-0.0279996
Q8H879	0.0661064	-0.0163284	0.0571521	0.0566028
Q8GU64	-0.0431424	-0.108857	-0.0779821	-0.0447353
Q5Z8V8	-0.0214019	-0.102238	-0.0251721	-0.0308285
Q7XS38	-0.0379784	-0.11321	-0.0597704	-0.0394111
Q0D8H0	0.00204475	-0.113884	-0.00173888	-0.0364366
Q7XIE2	0.010018	-0.0753466	-0.00737724	0.0523105
Q6ZFJ3	0.00767127	-0.106377	-0.00478612	-0.0187007
Q6ZJ16	-0.0446266	-0.162538	-0.0384348	-0.0423105
Q6ZH87	-0.0113677	-0.108536	0.00101655	-0.0489963
Q6H5W0	0.0186576	-0.0530137	-0.0122685	0.0295335
B9F6E8	-0.00738882	-0.0910409	-0.0216634	-0.0292638
Q5U1H6	-0.19509	-0.490867	0.037725	0.00909261
Q0DGD7	-0.0133449	-0.0877	-0.0389267	-0.010647
B7EF01	0.00371856	-0.179702	-0.0524878	0.0412296
Q75L87	-0.0649451	-0.173026	-0.120625	-0.0303439
Q9FW31	0.298192	-0.35669	-0.409611	-0.0232493
Q53RP2	0.097551	-0.00480338	0.0465167	0.0512821
A0A0N7KEB1	-0.127915	-0.214173	-0.113019	-0.0578674
Q8W3D9	-0.134807	-0.218893	-0.00789991	-0.112006
Q2QYH1	-0.0442883	-0.0974332	-0.0846048	0.0245979
B7EKA4	0.0835801	-0.146249	-0.0540026	0.0126439
Q10RS5	-0.0712985	-0.270065	-0.064978	-0.0141311
A0A0P0VU22	0.09552	0.088582	-0.109679	0.0924162
Q10N42	-0.013779	-0.0241015	-0.0347276	0.0545633
Q0DRB3	-0.0492384	-0.151127	-0.0743881	-0.0184541
Q10EQ6	0.0270772	-0.0461877	-0.0316098	0.0686694
Q2QYY2	-0.0283705	-0.167536	-0.0655535	0.00681781
A3CE59	0.00738361	-0.0879286	-0.0269786	-0.0026825
Q2QYD0	0.0433638	-0.0409571	0.0331145	-0.0264297
Q2R8J6	-0.14287	-0.23685	-0.0881126	0.0458263
P12124	0.0473712	-0.0913333	0.00255258	-0.0289209
Q7XGA9	-0.0354521	-0.0803513	0.00895279	-0.0421974
Q9FTN6	-0.144026	-0.236327	-0.21102	-0.0438968
Q9FTN5	-0.0924828	-0.199731	-0.132633	-0.0252241
Q8W250	-0.000488587	-0.190988	-0.0426471	-0.0372802
Q9LGP4	-0.030573	-0.125314	-0.0664491	-0.0847473
Q5ZCB1	-0.131754	-0.087757	-0.228407	-0.0707285
Q9FTR9	-0.209389	-0.203251	-0.301945	-0.0200581
Q9LGB2	-0.236247	-0.176794	-0.372361	-0.153804
Q9AS76	0.037926	-0.0374782	-0.0475327	0.0313382
Q5QNJ0	-0.0504377	-0.140919	-0.00915223	-0.0370226
Q5NAP3	-0.0629277	-0.0942866	-0.0580901	-0.0111095
Q9XHW8	-0.0370586	-0.0880059	-0.0130115	-0.00621174
Q9SDJ2	-0.0317759	-0.0723165	0.0097714	-0.059801
Q9FP25	-0.0435546	-0.353682	-0.0727016	0.0169833
Q9AXB0	-0.0556078	-0.197979	-0.0953052	-0.0291105
Q6V9T1	0.0502344	-0.108903	0.012346	-0.00297757
Q942G1	0.00708084	-0.083594	-0.00320609	-0.0175345
Q94EF2	-0.0212701	-0.105036	-0.0410645	0.0372536
Q8S091	0.00657169	-0.166821	0.0297606	0.0317048
Q5JN29	-0.0100055	-0.132191	0.0309533	-0.0560578
Q6Z901	0.0158934	-0.0472811	-0.0101445	0.0359676
Q6ETN3	0.161017	-0.0742003	0.0147337	0.0573096
Q6H7Q6	0.109619	-0.0200672	0.0448123	0.00571777
Q67TS1	0.028427	-0.0762577	-0.00257995	0.0161399
Q6YVF0	0.0183285	-0.121249	0.0378255	0.00692126
Q6K4S7	0.0632965	-0.0787694	-0.026441	0.0959443
Q6ZG77	-0.0274743	-0.0857929	-0.016635	-0.0219525
Q6ER87	0.0233976	-0.14866	-0.0328738	0.0415644
Q6K8J4	-0.0145042	-0.13838	-0.053138	-0.0444406
Q6K7X0	0.0386749	-0.1655	0.0258669	0.0184756
P14717	0.16583	-0.346447	-0.0182654	0.0495322
Q6H6L8	0.059062	-0.183262	-0.0281063	0.0588928
Q10SU0	0.118273	-0.104154	-0.122258	0.146981
Q10SM7	-0.014507	-0.117336	-0.0559341	-0.0479154
Q8H8D6	0.00328791	-0.0628217	-0.041969	0.0769323
Q8H8D8	0.023913	-0.0428931	-0.0452978	0.0736505
Q10QG5	0.0535632	-0.405632	-0.0193866	0.168777
Q0DTF5	-0.0273713	-0.133387	-0.0319808	0.0155644
Q10NX2	-0.00255708	-0.141566	0.0147149	0.0623886
Q10N88	0.0147974	-0.080425	-0.0151921	0.0205122
Q10LH0	0.0125856	-0.130653	0.0117089	0.00795925
Q9SXV0	-0.0153163	-0.034546	0.0549016	0.0552892
Q84MQ4	-0.0478263	-0.0947132	-0.0344521	-0.0165627
Q75KD7	-0.0339093	-0.100803	-0.0797632	-0.00867697
Q53RM0	-0.0728378	-0.148344	-0.0472945	-0.0590536
Q75I27	-0.000569763	-0.109973	-0.0590797	0.0338214
Q7XZY1	0.0224201	-0.029608	0.0200512	0.0555134
Q850T5	-0.0704036	-0.161318	-0.0305436	-0.0363345
Q6AVG6	-0.0158916	-0.118307	-0.0308742	-0.00872311
Q84MP7	-0.00918059	-0.0606129	0.0359586	0.0148161
Q851P9	0.0032516	-0.0525558	-0.0137102	0.0320932
Q84T92	-0.0443888	-0.141524	-0.0820834	-0.0108679
Q851N4	0.0835464	0.00342094	0.0868646	0.0251812
Q75IQ4	-0.0227649	-0.0821108	-0.0521742	-0.036421
Q84VC9	0.0100333	-0.176156	-0.0243404	0.00816099
Q0JF58	-0.0130538	-0.0639303	-0.0470946	0.0242756
Q7XS58	-0.0487556	-0.108728	-0.0350194	-0.0670754
Q7XNV4	-0.0332382	-0.130982	-0.0520825	0.0130047
Q7XLN8	0.0735245	-0.0734634	0.0462364	0.0676471
Q7XV86	-0.0227822	-0.0714856	-0.0266226	0.0466141
Q7XRB6	-0.00665565	-0.0893155	-0.0508946	0.0203393
Q7XV18	0.0289015	-0.0376028	-0.022237	0.085359
Q7XR26	-0.0228343	-0.0699234	0.0386836	-0.0177282
Q7XUQ3	0.101985	-0.0242703	0.0823581	5.42e-06
Q7XUK3	-0.0587765	-0.0498046	-0.131266	-0.0483883
Q7XSJ9	-0.0127501	-0.0976478	0.00612436	-0.034567
Q7XU74	-0.0186815	-0.0865647	-0.060665	-0.0543154
Q7FB12	0.0197402	-0.0653811	0.00276754	-0.00514396
Q7X806	0.0229723	-0.0433548	-0.0651463	0.0524903
Q7XPY2	-0.0674003	-0.0964253	-0.0268787	-0.0165568
Q7FAL6	0.0528321	-0.0481029	0.0326393	0.0244575
Q7XN85	-0.00759107	-0.114769	-0.035317	-0.0383203
Q0J9B4	0.0108451	-0.0358775	-0.0417318	0.0533838
Q75M18	0.0258729	-0.0869673	-0.00591439	0.0201026
Q688R1	0.0259285	-0.0590352	0.00684712	-0.0477542
Q75L39	0.17619	-0.18188	0.0177018	0.00230504
Q6ATB2	-0.0321309	-0.257765	-0.0898622	-0.0132382
Q5TKJ2	0.0112318	-0.0431761	0.00239908	0.0381997
Q75GM0	0.0330836	-0.0599022	0.00664618	0.0427726
Q60EA3	-0.0244088	-0.0798957	-0.0395438	-0.0142856
Q75II5	-0.022492	-0.0934972	-0.0158791	-0.0382444
Q0DFC9	-0.0604455	-0.119198	-0.0569551	-0.0534259
P41344	0.0102088	-0.0762984	0.0188266	-0.00474771
Q9LWT7	0.0186277	-0.0559843	0.0134877	0.0377916
Q5VRF4	-0.0423447	-0.124786	0.0126052	0.0458752
Q8H616	-0.0499903	-0.169179	-0.0605575	-0.0662378
Q5VME5	-0.0590221	-0.353417	-0.208644	-0.0154161
Q5Z4M6	-0.0388228	-0.0829488	0.00785738	-0.0340713
Q67WH3	0.00613832	-0.187878	-0.030777	-0.007222
Q94LW4	-0.0227613	-0.151539	-0.0124374	0.0584264
Q8H3X4	-0.0333169	-0.10196	-0.0495198	-0.0135008
Q69UU3	0.00325072	-0.0870078	-0.0449881	-0.0457613
Q7F1H3	-0.037548	-0.184109	-0.0356427	-0.0029918
Q6YT73	0.0370426	-0.0476215	-0.0164405	-0.0209016
A0A0P0X2H7	-0.109241	-0.189599	-0.0915851	-0.0985841
Q7XAL6	-0.0124309	-0.0677616	-0.022552	0.0195817
Q0D6L9	0.0562175	-0.0553843	0.0187146	0.0381154
Q7XII4	0.0110468	-0.0742982	-0.0211755	-0.00160813
Q8GVE1	0.0444052	-0.0404011	0.0259919	0.0424938
Q7XHN4	-0.0484196	-0.195778	-0.0600545	0.0271164
Q8H4E0	0.0164835	-0.0664234	0.0332788	0.00732513
Q8H2U6	0.0581799	-0.040065	0.00669554	0.0153894
A0A0P0XA86	0.0285667	-0.0446814	0.0386276	0.0389738
Q6ZDW8	-0.0420555	-0.143555	-0.0825906	0.022546
Q6Z1Y6	0.0180986	-0.053485	0.0368763	0.00810764
Q6ZC69	-0.00558925	-0.0933302	-0.0475926	-0.0466936
Q84ZL5	-0.0154842	-0.111265	-0.0332906	0.0194925
Q6Z9F9	0.0374061	-0.0379756	-0.0100572	0.0788021
Q6ZBZ2	0.0356653	-0.0558907	0.0208699	0.0424632
P16081	-0.102972	-0.209803	-0.0891012	-0.0689925
Q6ZDS0	0.0241027	-0.063397	0.00476338	-0.0172514
Q6ZFI6	0.0067836	-0.091071	-0.0281534	-0.0272524
Q84YK7	-0.0875317	-0.0984778	-0.0752153	-0.0346025
Q6ZI95	-0.139545	-0.337003	-0.210823	-0.0681573
Q650W6	-0.0298075	-0.105135	-0.0486627	-0.0367258
Q7G566	-0.0183887	-0.0413944	-0.0759008	0.0751546
Q7G754	0.003618	-0.0335692	-0.0564717	0.0747371
Q7XDQ5	0.028634	-0.0594156	-0.0363501	0.00473523
Q94LR9	-0.0605422	-0.121965	-0.175546	-0.0519658
Q0IWK4	0.0280501	-0.321256	-0.382868	-0.0596658
Q945W3	0.0178189	-0.121261	0.0378929	-0.0266503
Q945W2	-0.0350332	-0.145176	-0.0731209	-0.00599407
Q945W5	0.0249864	-0.0964513	-0.0183938	-0.0286763
Q7XCK0	0.0158788	-0.0247215	-0.0159019	0.0756333
Q53NP8	0.0149643	-0.0482438	-0.0236016	0.0352662
Q53N80	-0.00255075	-0.0939202	-0.0326573	-0.0134822
Q2R3A1	0.0319242	-0.311969	-0.111758	0.0447644
Q2R1P5	0.0226227	-0.132962	-0.0814213	-0.0162142
Q2R1J1	-0.0410183	-0.0940636	-0.0600746	-0.0166486
Q2R0R2	-0.0151956	-0.233925	0.00308336	0.0107061
Q2QYE1	-0.0609677	-0.117782	-0.0961489	-0.00163553
Q2QX08	-0.0584711	-0.125697	-0.07364	-0.0063007
Q0IPL3	-0.145098	-0.536517	-0.186468	-0.0246528
Q0ING3	0.0443559	-0.356562	-0.388797	-0.0785048
Q2QP54	-0.0407652	-0.102259	-0.0288448	-0.0387403
Q2QNS7	0.0756856	-0.0644265	0.00543562	0.0498916
Q2QNN5	-0.0144416	-0.162538	-0.316197	-0.0378684
Q7XT44	-0.0730454	-0.250522	-0.165895	-0.0241969
Q0JCX3	-0.0104928	-0.0942599	-0.0149823	-0.0168018
Q7XQC9	-0.0484325	-0.170344	-0.0668749	-0.0636861
Q0JJS8	-0.0342043	-0.14973	-0.0359925	-0.044295
Q337Y2	0.00883583	-0.0935935	-0.0606917	0.0115225
A3C592	0.0534371	-0.130664	-0.0261315	0.0494045
Q2QYK6	0.0394456	-0.25999	-0.0510852	0.0405022
Q0DZZ3	-0.190818	-0.295758	-0.162584	-0.0428264
Q10S49	0.0394216	-0.0259586	-0.0507927	0.131591
Q7XQQ7	-0.0358861	-0.112126	-0.0345091	-0.0400908
B9FIP1	0.0187363	-0.0322564	0.0535882	0.00460866
Q5VPR6	-0.0275013	-0.217187	-0.1263	0.0373313
B9FTR2	-0.003409	-0.161884	-0.0548527	-0.0133779
Q8GRK6	-0.0531623	-0.159866	-0.0773684	-0.0302466
Q6ZHK4	0.0778821	-0.0228526	0.0651975	0.030568
Q6Z4A7	-0.102607	-0.234092	-0.0685407	-0.0378649
Q0J8G4	-0.0472013	-0.125079	-0.096462	-0.0279421
A3A2W2	0.0121437	-0.088226	-0.0328124	0.040165
A3A9Y5	-0.0932836	-0.196873	-0.0716995	-0.0855324
Q2R776	-0.0599755	-0.154578	-0.0246098	-0.0174779
A3AMQ8	0.00554533	-0.105551	-0.0784603	-0.00131056
A3AMT5	-0.0676643	-0.0899452	-0.0892982	-0.0161058
A3AYD1	0.014249	-0.0625491	-0.0277767	0.0422332
A3BJV7	-0.0552913	-0.140622	-0.0676528	0.0142193
A3BKU8	0.0588036	-0.0470024	-0.0106361	0.00861215
A3BVP2	-0.215285	-0.179401	-0.210039	-0.078242
Q10RT4	0.00182426	-0.105719	0.00467997	0.0213467
B7E6T2	-0.0210808	-0.0516353	0.0456803	0.0378633
Q2QW32	-0.0839893	-0.222695	-0.185132	-0.0340333
B9F518	-0.0636757	-0.264672	-0.0622698	-0.110662
Q69SU2	-0.0320843	-0.0971701	-0.0351741	0.04081
Q8H069	-0.0322474	-0.110561	0.0194636	0.0107525
Q8W3J0	0.030307	-0.119356	-0.0448035	-0.0219044
Q10N28	0.0595115	-0.0366061	0.0288262	0.00151605
Q6F381	0.0183518	-0.147846	0.00263281	0.0396248
B9FF16	0.00398474	-0.0961993	0.0370574	-0.010244
Q7XQQ3	-0.125979	-0.098672	-0.000421202	-0.00205593
B9FFL9	-0.0410211	-0.102825	0.00556482	-0.050855
B9FM49	-0.0320625	-0.115496	0.00429908	-0.0129314
B9G7K8	-0.0554156	-0.111967	-0.0525857	-0.0607868
A0A0P0Y3H3	-0.0093972	-0.0889768	0.0157427	0.10663
B9FS99	0.057913	-0.104214	0.0403446	0.0292717
B9FVY5	-0.0539353	-0.0493998	-0.095831	-0.0165971
Q0J7M1	-0.0162476	-0.089608	0.027061	-0.0186609
Q6YZE2	-0.0584571	-0.124282	-0.0516938	-0.0559494
B9G7X4	0.0573881	0.0379239	0.0654518	0.131297
B9G6E5	0.00853923	-0.0789409	-0.00952892	-0.0404172
B9G6K2	-0.209662	-0.238581	-0.22484	-0.116009
B9G754	0.0233187	-0.0672415	-0.0203201	0.00303396
B9GAQ9	0.0219655	-0.0875774	-0.0514692	0.265291
B9GDU6	0.066796	-0.0085177	-0.0383467	0.0647324
B9EUL1	-0.190349	-0.409266	-0.205757	-0.20398
Q8W084	0.0657254	0.0547507	0.19395	0.0821124
B9F0T2	-0.0122544	-0.13485	-0.0861598	0.0114397
B9F1V9	0.0111203	-0.0861817	-0.053064	0.0332808
B9F2K5	-0.031352	-0.0800091	-0.0480792	-0.0597788
B9F8C9	-0.182909	-0.294496	-0.181491	-0.0845803
Q8LLN0	0.0465383	-0.115186	0.142829	0.0846298
B9FHU8	-0.0362417	-0.0887226	-0.0986322	-0.0296332
B9FH15	0.0388099	-0.0372655	0.063789	0.0184578
B9FLV4	-0.00673317	-0.0671758	-0.0365225	0.0292082
B9FRH0	-0.0182682	-0.10559	-0.0119099	-0.0403547
B9FTD3	0.0480668	-0.0687368	0.00960758	0.0999739
B9FQL8	0.0107389	-0.0963758	0.0852744	-0.0385646
Q8H367	0.158132	-0.113262	-0.137793	0.00661126
B9FUI4	-0.32719	-0.360821	-0.390673	-0.109136
B9FZ04	0.0443892	-0.184569	-0.0902088	0.0670479
B9FZF6	-0.0153349	-0.10123	-0.00977929	0.0220165
B9G167	0.00570464	-0.051154	0.00187663	0.03824
Q0JP95	0.0510837	-0.100685	0.0327055	0.0202769
Q0DRP7	-0.00533439	-0.0222565	0.058373	0.0293922
Q60EL7	-0.127127	-0.17447	-0.159714	-0.0438053
A3BKR0	0.0182928	-0.0287934	-0.0152236	0.0719376
Q84QW4	-0.0171352	-0.142067	-0.0675157	0.00338641
C7IY39	0.0383687	-0.0780708	-0.0277905	0.0240152
Q2R0I1	-0.293738	-0.372748	-0.267826	-0.101675
A3BKF2	-0.0449152	-0.130295	-0.00491949	-0.0475843
I7HDC2	0.148502	-0.014566	0.108552	0.017801
Q9LWJ2	0.0701399	-0.0176745	-0.0447203	-0.00286883
Q65X81	0.0907194	-0.00802704	0.0305369	-0.00399698
Q5SMT0	0.0630501	0.0795189	0.0235076	0.0539087
Q8H7S6	0.136913	0.127236	0.0892146	0.0567344
Q5W6F1	0.137167	0.126367	0.0397594	0.042753
Q60EJ3	0.108126	0.05688	0.0818773	0.0507596
Q5TKQ1	0.0965214	0.0702184	-0.0427209	-0.00937751
Q67WR5	0.0983178	0.109002	0.00460718	0.055899
Q9XGP7	0.197112	0.0910662	0.0471651	0.0426877
Q10A46	0.106716	0.153167	0.0206301	0.0303048
Q53Q17	0.175977	0.0459675	0.0391583	0.0959639
Q2QND8	0.0552112	-0.0250118	-0.00705725	-0.000567235
A0A0P0VGR3	0.0557359	-0.042653	-0.000153105	-0.0307688
B9EYM2	0.0544046	0.0195292	-0.0324079	-0.0223747
E9KIM9	-0.0023921	-0.0431507	0.0814034	-0.0487131
E9KIP7	-0.0244731	-0.0818676	-0.00363185	-0.0670776
P12123	0.0352965	-0.0312763	0.0277096	-0.0491334
Q8RZW7	0.00315276	0.0674899	0.0302775	-0.0572917
Q60DM0	-0.0463716	-0.0171077	-0.0468056	-0.0905143
Q5VMA1	0.204251	0.133222	0.210683	0.089351
Q10FE5	0.0164776	0.00716854	0.105472	-0.0472634
Q5JNF3	0.0386817	-0.0469939	0.0340979	-0.00987792
Q6ER94	-0.0450046	-0.030691	0.0695274	-0.0252692
Q6Z2U3	0.00494947	-0.0290497	0.102056	-0.0462523
Q6K8N9	0.0507339	-0.00826602	0.0297341	-0.052856
Q10SL6	0.00511233	0.060942	0.130685	-0.0295755
Q10R10	0.0134017	0.00202562	0.0247036	-0.0930839
Q10HR9	-0.120985	0.00221274	-0.0170493	-0.142883
Q75IA6	0.0458564	0.0467066	0.0506194	-0.0426484
Q7X7H3	-0.00266229	-0.0386335	0.0491958	-0.0591144
Q0DG76	-0.0452983	-0.0934953	-0.0267789	-0.0930335
Q84PB7	-0.125324	-0.0925679	-0.12406	-0.226183
Q6K2P3	0.0698493	-0.0613955	0.0825672	-0.0203314
Q69QQ2	0.0181238	0.0673448	0.13415	0.0144472
A3C4S4	-0.0675829	-0.0254301	-0.0276337	-0.0862959
Q2QNV2	0.102897	0.216383	0.15277	0.0231428
Q2QNG7	-0.0563111	0.0175759	-0.0094629	-0.0772866
Q2QLI3	0.0176335	0.0260665	0.038314	-0.082169
Q84NN4	-0.0267904	-0.057229	0.0343883	-0.0874792
A3BYT1	-0.00519144	-0.055479	0.0461171	-0.12343
A3C0W4	-0.0380132	-0.0582371	-0.0255862	-0.116542
A2ZQ66	0.069174	0.0942467	0.0848304	-0.0138714
A3CGG2	-0.049538	-0.0787581	0.0157082	-0.0885356
B7E914	0.015822	0.0550226	0.0763119	-0.0209792
B9FSC3	-0.0159163	-0.0769615	0.0737705	-0.0469517
Q2QM23	-0.0173828	0.00423646	0.105659	-0.0255233
B9ETM9	-0.0184682	-0.021814	0.0621419	-0.0165225
B9EWA5	0.0544947	0.0504885	0.109472	-0.010672
B9FR42	0.0322124	-0.0341261	0.011491	-0.0474531
Q2R2W2	-0.061836	0.0387175	0.0306117	-0.073505
Q0D9D0	0.0219929	0.0691418	0.113241	-0.0137895
